# Supplementary material
Source: PubMed Central journal article supplement (PMC10082163)
Supplement: 41598_2023_32745_MOESM1_ESM.pdf [file 41598_2023_32745_MOESM1_ESM.pdf]

# Supplemental Fig. 1

**A**

**Con-IP**

**Interstitial pneumonia**

**1W**

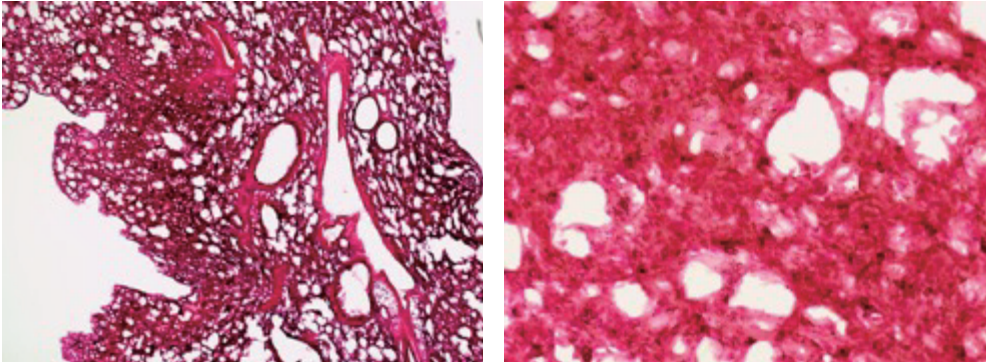

**2W**

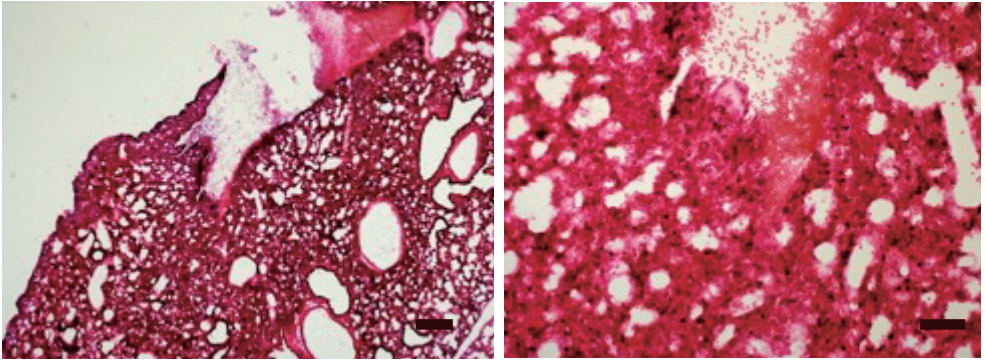

**B**

**Si-IP**

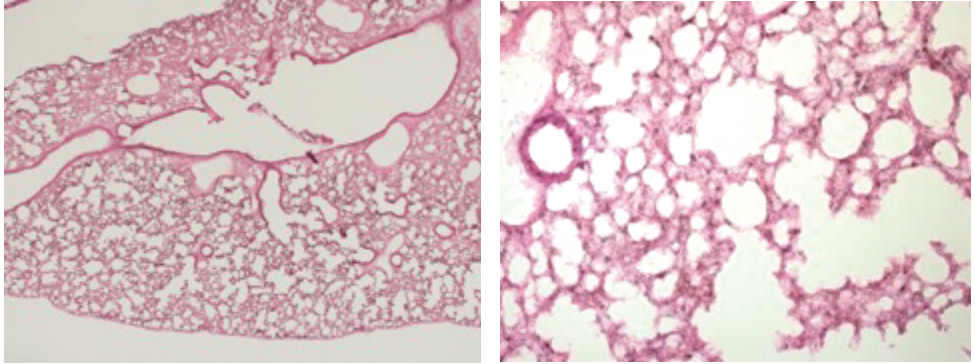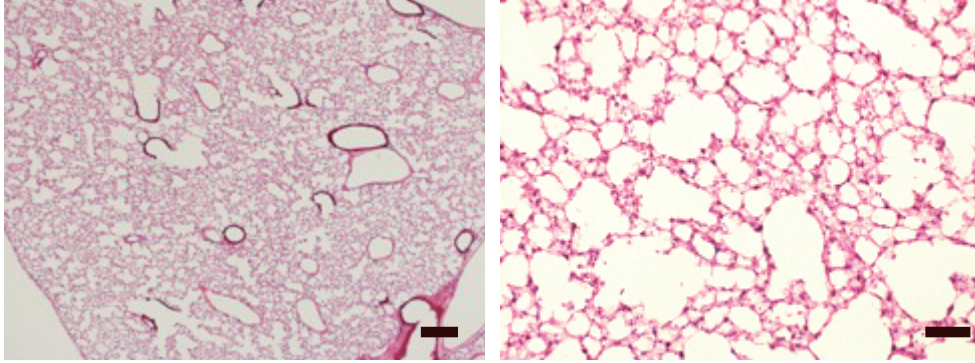

## **Supplementary Fig. S1**

Pathologic analysis of HE-stained lung specimens (A, B).

Additional microphotographs of the lung in the IP model mice treated with MTX for 1 week (upper panel) and 2 weeks (bottom panel). (A) Con-IP group (B) Si-IP group.

Scale bar: 200  $\mu\text{m}$  (A, B: left); 100  $\mu\text{m}$  (A, B: right).
